# Supplementary material
Source: PubMed Central journal article supplement (PMC8742750)
Supplement: NIHMS1744627-supplement-supinfo.pdf [file NIHMS1744627-supplement-supinfo.pdf]

**Supplementary Table S1:** ICD-9 and E codes used to identify participants with a fall-related injury

| ICD-9 or E Code            | Definition                                                                                                    |
|----------------------------|---------------------------------------------------------------------------------------------------------------|
| <b>Fracture</b>            |                                                                                                               |
| 800                        | Fracture of vault of skull                                                                                    |
| 801                        | Fracture of base of skull                                                                                     |
| 802                        | Fracture of face bones                                                                                        |
| 803                        | Other and unqualified skull fractures                                                                         |
| 804                        | Multiple fractures involving skull or face with other bones                                                   |
| 805                        | Fracture of vertebral column without mention of spinal cord injury                                            |
| 806                        | Fracture of vertebral column with spinal cord injury                                                          |
| 807.0-807.2                | Fracture of rib(s), sternum, larynx, and trachea                                                              |
| 808.0-808.9                | Fracture of pelvis                                                                                            |
| 810                        | Fracture of clavicle                                                                                          |
| 811                        | Fracture of scapula                                                                                           |
| 812                        | Fracture of humerus                                                                                           |
| 813                        | Fracture of radius and ulna                                                                                   |
| 814                        | Fracture of carpal bone(s)                                                                                    |
| 815                        | Fracture of metacarpal bone(s)                                                                                |
| 816                        | Fracture of one or more phalanges of hand                                                                     |
| 817                        | Multiple fractures of hand bones                                                                              |
| 818.0-818.1                | Ill-defined fractures of upper limb                                                                           |
| 819.0-819.1                | Multiple fractures involving both upper limbs and upper limb with rib(s) and sternum                          |
| 820                        | Fracture of neck of femur                                                                                     |
| 821                        | Fracture of other and unspecified parts of femur                                                              |
| 822                        | Fracture of patella                                                                                           |
| 823                        | Fracture of tibia and fibula                                                                                  |
| 824                        | Fracture of ankle                                                                                             |
| 825                        | Fracture of one or more tarsal and metatarsal bones                                                           |
| 826                        | Fracture of one or more phalanges of foot                                                                     |
| 827                        | Other multiple and ill-defined fractures of lower limb                                                        |
| 828                        | Multiple fractures involving both lower limbs lower with upper limb and lower limb(s) with rib(s) and sternum |
| 829                        | Fracture of unspecified bones                                                                                 |
| <b>Intracranial Injury</b> |                                                                                                               |
| 850                        | Concussion                                                                                                    |
| 851                        | Cerebral laceration and contusion                                                                             |
| 852                        | Subarachnoid subdural and extradural hemorrhage following injury                                              |
| 853                        | Other and unspecified intracranial hemorrhage following injury                                                |
| 854                        | Intracranial injury of other and unspecified nature                                                           |
| <b>Dislocation</b>         |                                                                                                               |
| 830                        | Dislocation of jaw                                                                                            |
| 831                        | Dislocation of shoulder                                                                                       |
| 832                        | Dislocation of elbow                                                                                          |
| 833                        | Dislocation of wrist                                                                                          |
| 834                        | Dislocation of finger                                                                                         |
| 835                        | Dislocation of hip                                                                                            |
| 836                        | Dislocation of knee                                                                                           |
| 837                        | Dislocation of ankle                                                                                          |

|                        |                                                                                 |
|------------------------|---------------------------------------------------------------------------------|
| 838                    | Dislocation of foot                                                             |
| 839                    | Other multiple and ill-defined dislocations                                     |
| <b>Contusion</b>       |                                                                                 |
| 920                    | Contusion of face, scalp, and neck except eye(s)                                |
| 921                    | Contusion of eye and adnexa                                                     |
| 922                    | Contusion of trunk                                                              |
| 923                    | Contusion of upper limb                                                         |
| 924                    | Contusion of lower limb and of other and unspecified sites                      |
| <b>Accidental Fall</b> |                                                                                 |
| E880                   | Accidental fall on or from stairs or steps                                      |
| E881                   | Accidental fall on or from ladders or scaffolding                               |
| E882                   | Accidental fall from or out of building or other structure                      |
| E883                   | Accidental fall into hole or other opening in surface                           |
| E884                   | Other accidental falls from one level to another                                |
| E885                   | Accidental fall on same level from slipping tripping or stumbling               |
| E886                   | Fall on same level from collision, pushing, or shoving, by or with other person |
| E887                   | Fracture, cause unspecified                                                     |
| E888                   | Other and unspecified fall                                                      |
| V15.88                 | History of falls                                                                |

Abbreviations: ICD-9 = International Classification of Diseases, Ninth Revision

**Supplementary Table S2: Classification of medications and minimum effective dose**

| <b>Drug Class</b>                         | <b>Individual Medications</b>    | <b>Minimum Effective Geriatric Daily Dose</b> |
|-------------------------------------------|----------------------------------|-----------------------------------------------|
| <b>Benzodiazepines/Sedative Hypnotics</b> |                                  |                                               |
|                                           | Alprazolam                       | 0.25 mg                                       |
|                                           | Chlordiazepoxide                 | 10 mg                                         |
|                                           | Clonazepam                       | 0.5 mg                                        |
|                                           | Clorazepate                      | 7.5 mg                                        |
|                                           | Diazepam                         | 1 mg                                          |
|                                           | Eszopiclone                      | 1 mg                                          |
|                                           | Flurazepam                       | 15 mg                                         |
|                                           | Lorazepam                        | 0.5 mg                                        |
|                                           | Oxazepam                         | 20 mg                                         |
|                                           | Temazepam                        | 7.5 mg                                        |
|                                           | Triazolam                        | 0.0625 mg                                     |
|                                           | Zaleplon                         | 5 mg                                          |
|                                           | Zolpidem                         | 5 mg                                          |
|                                           | Buspirone                        | 15 mg                                         |
|                                           | Chloral hydrate                  | 250 mg                                        |
| <b>Opioids <sup>a</sup></b>               |                                  |                                               |
|                                           | Codeine                          | 200 mg (0.15)                                 |
|                                           | Fentanyl transdermal             | 12.5 mg (2.4)                                 |
|                                           | Hydrocodone                      | 30 mg (1.00)                                  |
|                                           | Hydromorphone                    | 7.5 mg (4.00)                                 |
|                                           | Levorphanol                      | 2.7 mg (11.00)                                |
|                                           | Meperidine                       | 300 mg (0.10)                                 |
|                                           | Methadone                        | 10 mg (3.00)                                  |
|                                           | Morphine                         | 30 mg                                         |
|                                           | Opium<br>tinctures/suppositories | 300 mg (0.10)                                 |
|                                           | Oxycodone                        | 20 mg (1.5)                                   |
|                                           | Propoxyphene                     | 130.4 mg (0.23)                               |
|                                           | Tramadol                         | 300 mg (0.10)                                 |
| <b>Antipsychotics</b>                     |                                  |                                               |
|                                           | Aripiprazole                     | 10 mg                                         |
|                                           | Chlorpromazine <sup>b</sup>      | 10 mg                                         |
|                                           | Clozapine <sup>b</sup>           | 12.5 mg                                       |
|                                           | Haloperidol                      | 0.5 mg                                        |
|                                           | Lurasidone                       | 40 mg                                         |
|                                           | Olanzapine <sup>b</sup>          | 5 mg                                          |
|                                           | Perphenazine                     | 12 mg                                         |
|                                           | Quetiapine                       | 50 mg                                         |
|                                           | Risperidone                      | 1 mg                                          |
|                                           | Thioridazine <sup>b</sup>        | 10 mg                                         |
|                                           | Thiothixene                      | 6 mg                                          |
|                                           | Trifluoperazine <sup>b</sup>     | 0.5 mg                                        |
| <b>Antidepressants</b>                    |                                  |                                               |
| <b>Tricyclic antidepressants</b>          |                                  |                                               |
|                                           | Nortriptyline <sup>b</sup>       | 30 mg                                         |
|                                           | Desipramine <sup>b</sup>         | 25 mg                                         |
|                                           | Clomipramine <sup>b</sup>        | 25 mg                                         |
|                                           | Amitriptyline <sup>b</sup>       | 10 mg                                         |

|                                  |                                                   |                       |
|----------------------------------|---------------------------------------------------|-----------------------|
|                                  | Amitriptyline/Perphenazine <sup>b</sup>           | 10 mg                 |
|                                  | Doxepin <sup>b</sup>                              | 10 mg                 |
| SSRIs                            | Imipramine <sup>b</sup>                           | 25 mg                 |
|                                  | Paroxetine <sup>b</sup>                           | 10 mg                 |
|                                  | Citalopram                                        | 20 mg                 |
|                                  | Escitalopram                                      | 10 mg                 |
|                                  | Fluoxetine                                        | 20 mg                 |
|                                  | Fluvoxamine                                       | 50 mg                 |
| SNRIs                            | Sertraline                                        | 25 mg                 |
|                                  | Duloxetine                                        | 20 mg                 |
| Other                            | Venlafaxine                                       | 50 mg                 |
|                                  | Bupropion                                         | 150 mg                |
|                                  | Maprotiline                                       | 25 mg                 |
|                                  | Mirtazapine                                       | 15 mg                 |
|                                  | Trazodone                                         | 25 mg                 |
|                                  | Nefazodone                                        | 100 mg                |
|                                  | Phenelzine                                        | 7.5 mg                |
|                                  | Tranlycypromine                                   | 30 mg                 |
| <b>Skeletal muscle relaxants</b> |                                                   |                       |
|                                  | Baclofen                                          | 10 mg                 |
|                                  | Carisoprodol                                      | 750 mg                |
|                                  | Cyclobenzaprine <sup>b</sup>                      | 5 mg                  |
|                                  | Dantrolene                                        | 25 mg                 |
|                                  | Methocarbamol                                     | 600 mg                |
|                                  | Tizanidine hydrochloride                          | 12 mg                 |
| <b>Anticholinergics</b>          |                                                   |                       |
|                                  | Hydroxyzine                                       | 75 mg                 |
|                                  | Cyproheptadine                                    | 4 mg                  |
|                                  | Procyclidine                                      | 2.5 mg                |
|                                  | Glycopyrrolate                                    | 0.6 mg                |
|                                  | Solifenacin                                       | 5 mg                  |
|                                  | Prochlorperazine                                  | 15 mg                 |
|                                  | Promethazine                                      | 50 mg                 |
|                                  | Scopolamine oral                                  | 0.0195 mg             |
|                                  | Scopolamine patch                                 | 0.33 mg               |
|                                  | Benztropine                                       | 0.5 mg                |
|                                  | Trihexyphenidyl                                   | 6 mg                  |
|                                  | Darifenacin                                       | 7.5 mg                |
|                                  | Oxybutynin oral                                   | 5 mg                  |
|                                  | Tolterodine                                       | 2 mg                  |
|                                  | Trospium                                          | 20 mg                 |
|                                  | Atropine                                          | 0.0582 mg             |
|                                  | Belladonna suppository <sup>b</sup>               | 1 suppository = 1 SSD |
|                                  | Levorotatory alkaloids of belladonna <sup>b</sup> | 1 tablet = 1 SSD      |
|                                  | Dicyclomine                                       | 40 mg                 |
|                                  | Homatropine                                       | 6 mg                  |
|                                  | Hyoscyamine                                       | 0.75 mg               |
|                                  | Propantheline bromide                             | 22.5 mg               |

Abbreviations: TCA = tricyclic antidepressants, SSRI = selective serotonin reuptake inhibitor, SNRI = serotonin norepinephrine reuptake inhibitor, MAOI = monoamine oxidase inhibitor

<sup>a</sup>For opioids, number in parentheses after dose refers to morphine equivalents

<sup>b</sup>These medications have anticholinergic activity and were included in creating the anticholinergic exposure variable.

**Supplementary Table S3: ICD-9 codes used for covariates**

| <b>ICD-9 Code</b>           | <b>Definition</b>                                           |
|-----------------------------|-------------------------------------------------------------|
| <b>Depression</b>           |                                                             |
| 296.2                       | Major depressive disorder, single episode                   |
| 296.3                       | Major depressive disorder, recurrent episode                |
| 298.0                       | Depressive type psychosis                                   |
| 300.4                       | Dysthymic disorder                                          |
| 301.12                      | Chronic depressive personality disorder                     |
| 309.1                       | Prolonged depressive reaction                               |
| 311                         | Depressive disorder, not elsewhere classified               |
| <b>Anxiety</b>              |                                                             |
| 300.0                       | Anxiety states                                              |
| 300.2                       | Phobic disorders                                            |
| 309.2                       | Adjustment disorder                                         |
| <b>Parkinson's Disease</b>  |                                                             |
| 332.0                       | Primary Parkinsonism                                        |
| <b>Insomnia</b>             |                                                             |
| 780.5                       | Sleep disturbances                                          |
| 327.0                       | Organic sleep disorders of initiating and maintaining sleep |
| <b>Urinary Incontinence</b> |                                                             |
| 788.3                       | Urinary incontinence, unspecified                           |

Abbreviations: ICD-9 = International Classification of Diseases, Ninth Revision

**Supplementary Table S4.** Average change in SDD from index of CNS-active medications according to use at index (restricted to index during 1994-2003)

| CNS use at index                              | Fall-related injury at index | SDD at index | Average change in SDD from index |                      |                      |
|-----------------------------------------------|------------------------------|--------------|----------------------------------|----------------------|----------------------|
|                                               |                              |              | 3 months                         | 6 months             | 12 months            |
| <b>Primary Analysis</b>                       |                              |              |                                  |                      |                      |
| Users at index                                | Yes                          | 2.8 (3.9)    | -0.22 (-0.47, 0.03)              | -0.34 (-0.64, -0.04) | -0.45 (-0.79, -0.11) |
|                                               | No                           | 2.3 (2.7)    | -0.70 (-0.81, -0.59)             | -0.71 (-0.83, -0.58) | -0.67 (-0.83, -0.52) |
|                                               | p-value <sup>1</sup>         |              | <0.001                           | 0.021                | 0.255                |
| Non-users at index                            | Yes                          |              | 0.24 (0.13, 0.35)                | 0.20 (0.14, 0.26)    | 0.19 (0.13, 0.25)    |
|                                               | No                           |              | 0.20 (0.17, 0.24)                | 0.21 (0.17, 0.25)    | 0.26 (0.21, 0.30)    |
|                                               | p-value <sup>1</sup>         |              | 0.516                            | 0.819                | 0.050                |
| <b>Sensitivity Analysis (without opioids)</b> |                              |              |                                  |                      |                      |
| Users at index                                | Yes                          |              | 0.00 (-0.26, 0.28)               | -0.22 (-0.54, 0.12)  | -0.34 (-0.71, 0.03)  |
|                                               | No                           |              | -0.54 (-0.67, -0.40)             | -0.53 (-0.68, -0.39) | -0.53 (-0.71, -0.34) |
|                                               | p-value <sup>1</sup>         |              | <0.001                           | 0.065                | 0.396                |
| Non-users at index                            | Yes                          |              | 0.16 (0.10, 0.21)                | 0.17 (0.12, 0.22)    | 0.15 (0.10, 0.21)    |
|                                               | No                           |              | 0.18 (0.15, 0.22)                | 0.19 (0.15, 0.23)    | 0.24 (0.19, 0.28)    |
|                                               | p-value <sup>1</sup>         |              | 0.469                            | 0.473                | 0.014                |

Abbreviations: CNS = central nervous system; SDD = standardized daily dose

<sup>1</sup>p-value corresponding to test of whether average change in SDD from index differs between those with fall-related injury and those without

\*Estimates for average change in SDD at each time point (relative to index) are based on adjusted regression models and standardized to a common distribution of covariates. Regression models were adjusted for the following covariates (as of index): age (spline 2df), calendar time (spline 2df), class(es) of CNS medications used, clinical encounter type at index, ACT cohort, gender, race/ethnicity, education, self-rated health, frail (per gait speed), cognition, treatment for hypertension, treatment for diabetes, osteoarthritis, coronary artery disease, stroke, anxiety, depression, urinary incontinence, Parkinson's disease, insomnia, and prior falls.

**Supplementary Table S5.** Average change in SDD from index of CNS-active medications according to use at index (restricted to index during 2004-2014)

| CNS use at index                              | Fall-related injury at index | SDD at index | Average change in SDD from index |                      |                      |
|-----------------------------------------------|------------------------------|--------------|----------------------------------|----------------------|----------------------|
|                                               |                              |              | 3 months                         | 6 months             | 12 months            |
| <b>Primary Analysis</b>                       |                              |              |                                  |                      |                      |
| Users at index                                | Yes                          | 2.1 (1.7)    | -0.53 (-0.69, -0.37)             | -0.44 (-0.61, -0.27) | -0.39 (-0.57, -0.21) |
|                                               | No                           | 2.1 (2.0)    | -0.62 (-0.75, -0.50)             | -0.57 (-0.68, -0.46) | -0.63 (-0.77, -0.49) |
|                                               | p-value <sup>1</sup>         |              | 0.344                            | 0.210                | 0.033                |
| Non-users at index                            | Yes                          |              | 0.11 (0.07, 0.16)                | 0.16 (0.10, 0.21)    | 0.15 (0.09, 0.20)    |
|                                               | No                           |              | 0.21 (0.17, 0.26)                | 0.23 (0.18, 0.27)    | 0.22 (0.17, 0.27)    |
|                                               | p-value <sup>1</sup>         |              | 0.001                            | 0.033                | 0.021                |
| <b>Sensitivity Analysis (without opioids)</b> |                              |              |                                  |                      |                      |
| Users at index                                | Yes                          |              | -0.41 (-0.59, -0.23)             | -0.35 (-0.56, -0.15) | -0.26 (-0.49, -0.03) |
|                                               | No                           |              | -0.50 (-0.66, -0.34)             | -0.46 (-0.60, -0.31) | -0.56 (-0.73, -0.39) |
|                                               | p-value <sup>1</sup>         |              | 0.373                            | 0.302                | 0.015                |
| Non-users at index                            | Yes                          |              | 0.10 (0.06, 0.14)                | 0.13 (0.07, 0.18)    | 0.13 (0.08, 0.19)    |
|                                               | No                           |              | 0.19 (0.15, 0.23)                | 0.20 (0.15, 0.24)    | 0.20 (0.15, 0.24)    |
|                                               | p-value <sup>1</sup>         |              | 0.002                            | 0.021                | 0.049                |

Abbreviations: CNS = central nervous system; SDD = standardized daily dose

<sup>1</sup>p-value corresponding to test of whether average change in SDD from index differs between those with fall-related injury and those without

\*Estimates for average change in SDD at each time point (relative to index) are based on adjusted regression models and standardized to a common distribution of covariates. Regression models were adjusted for the following covariates (as of index): age (spline 2df), calendar time (spline 2df), class(es) of CNS medications used, clinical encounter type at index, ACT cohort, gender, race/ethnicity, education, self-rated health, frail (per gait speed), cognition, treatment for hypertension, treatment for diabetes, osteoarthritis, coronary artery disease, stroke, anxiety, depression, urinary incontinence, Parkinson's disease, insomnia, and prior falls.
